# Supplementary material
Source: publisher figshare collection journal article supplement (https://gsapubs.figshare.com/ndownloader/files/23315540)
Supplement: Supplementary file 1 [file 23315540]

## Sheet: Sheet1
Source	Site Locationa	Latitude (°)	Longitude (°)	D (cm2/yr)	Db uncertainty (cm2/yr)	AI	MAP (cm/yr)	Underlying lithology description	Lithology categoryc	Technique description	Technique categoryd	Vegetation description	Vegetation categorye
Almond et al. [2008]	Charwell Basin, New Zealand	-42.4496	173.357	50	20	1.4203	115.9	Loess underlain by fluvial gravel terraces	1	Erosion rate and curvature. Estimate is for the Holocene. Similar technique to Roering et al. (2002).	2	Podocarp, hardwood, and beech forest	3
Almond et al. [2008]	Ahuriri, New Zealand	-43.7017	172.584	70	20	0.7639	68.8	Thick loess deposits underlain by altered basalt	1	137Cs fallout nuclides (50 yr timescale) and curvature. Similar technique to Roering et al. (2002).	2	Recolonization of forest during Holocene. Recently introduced pasture grasses.	2
Arrowsmith et al. (1998)	Carrizo Plain, CA, USA	35.2713	-119.827	86	8	0.3323	46.7	Conglomerate and alluvial fan units.	2	Scarp modeling	1	Grasses and shrubs	2
Avouac and Peltzer (1993)	Hotan Region, Xinjiang, China	36.8	80.5	33	14	0.0278	3.3	Loose fan gravels	1	Scarp modeling	1	Unvegetated	1
Avouac et al. (1993)	Tien Shan, China	44.0478	86.7901	55	25	0.1854	18.4	Loose fan gravels	1	Scarp modeling	1	Grasses and shrubs	2
Ben-Asher et al. (2017)	Odem cinder cone, Golan Heights, Israel	33.197	35.755	12	--	0.7138	79.1	Cinder	1	Assumed initial shape and age in conjunction with a numerical model	1	scrubland	2
Ben-Asher et al. (2017)	Baron cinder cone, Golan Heights, Israel	33.158	35.779	32	--	0.6354	73	Cinder	1	Assumed initial shape and age in conjunction with a numerical model	3	scrubland	2
Ben-Asher et al. (2017)	Bental cinder cone, Golan Heights, Israel	33.13	35.783	56	--	0.6381	72.8	Cinder	1	Assumed initial shape and age in conjunction with a numerical model	3	scrubland	2
Ben-Asher et al. (2017)	Shifon cinder cone, Golan Heights, Israel	33.069	35.771	54	--	0.5688	66.1	Cinder	1	Assumed initial shape and age in conjunction with a numerical model	3	scrubland	2
Ben-Asher et al. (2017)	Fares cinder cones, Golan Heights, Israel	32.96	35.865	63	--	0.4375	53.9	Cinder	1	Assumed initial shape and age in conjunction with a numerical model	3	scrubland	2
Begin (1992)	Northern Negev, Israel	31.262	34.8024	4.3	3	0.1607	23.3	Fluvial gravel terraces	1	Scarp modeling	3	Unvegetated	1
Bowman and Gerson (1986)	Lake Lisan, Dead Sea, Israel	31.386	35.361	3.7	--	0.0657	10.9	Gravel	1	Scarp modeling	1	Unvegetated	1
Bowman and Gross (1989) as reported in Hanks (2000)	Northern Arava, Israel	30.6584	35.2403	4	--	0.0363	6	Gravel	1	Scarp modeling	1	Unvegetated	1
Callaghan (2012)	Chile	-32.99	-71.42	55.1	24	0.4115	48.2	Granitic	3	Relief and erosion rate	5	Mostly herbaceous with some trees	3
Callaghan (2012)	Chile	-32.98	-71.42	69.9	36	0.4321	51.8	Granitic	3	Relief and erosion rate	5	Mostly herbaceous with some trees	3
Callaghan (2012)	Chile	-32.98	-71.42	41.3	20	0.4321	51.8	Granitic	3	Relief and erosion rate	5	Mostly herbaceous with some trees	3
Callaghan (2012)	Chile	-32.94	-71.43	46.1	20	0.3366	39.7	Granitic	3	Relief and erosion rate	5	Mostly herbaceous with some trees	3
Callaghan (2012)	Chile	-33.01	-71.44	58.1	27	0.451	53.1	Granitic	3	Relief and erosion rate	5	Herbaceous with few trees	2
Callaghan (2012)	Chile	-31.12	-71.58	46.2	7	0.1432	16.7	Granitic	3	Relief and erosion rate	5	Mostly herbaceous with some trees	3
Callaghan (2012)	Chile	-31.12	-71.56	44	13	0.1475	16.7	Granitic	3	Relief and erosion rate	5	Mostly herbaceous with some trees	3
Callaghan (2012)	Chile	-31.12	-71.55	48.6	13	0.1595	18.3	Granitic	3	Relief and erosion rate	5	Mostly herbaceous with few trees with some bare ground	2
Callaghan (2012)	Chile	-30.55	-71.63	158	68	0.1281	13.8	Granitic	3	Relief and erosion rate	5	Mostly herbaceous with some trees	3
Callaghan (2012)	Chile	-30.55	-71.63	212	92	0.1281	13.8	Granitic	3	Relief and erosion rate	5	Mostly herbaceous with few trees and some bare ground	2
Callaghan (2012)	Chile	-29.62	-71.2	37.7	13	0.0688	7.6	Granitic	3	Relief and erosion rate	5	Mostly herbaceous with few trees and some bare ground	2
Callaghan (2012)	Chile	-29.62	-71.2	37.8	11	0.0688	7.6	Granitic	3	Relief and erosion rate	5	Mostly herbaceous with few trees and some bare ground	2
Callaghan (2012)	Chile	-29.62	-71.2	34.6	12	0.0688	7.6	Granitic	3	Relief and erosion rate	5	Mostly herbaceous with few trees and some bare ground	2
Callaghan (2012)	Chile	-29.58	-71.14	19.9	7	0.0644	7.3	Granitic	3	Relief and erosion rate	5	Mostly herbaceous with few trees and some bare ground	2
Callaghan (2012)	Chile	-29.57	-71.16	18.7	7	0.0648	7.4	Granitic	3	Relief and erosion rate	5	Mostly herbaceous with few trees and some bare ground	2
Callaghan (2012)	Chile	-29.22	-71.18	26.5	9	0.0556	6.5	Granitic	3	Relief and erosion rate	5	Mixture of herbaceous groundcover and bare ground	2
Callaghan (2012)	Chile	-29.23	-71.18	14.4	5	0.0548	6.5	Granitic	3	Relief and erosion rate	5	Mixture of herbaceous groundcover and bare ground	2
Callaghan (2012)	Chile	-28.41	-71.05	15.5	7	0.0369	4.7	Granitic	3	Relief and erosion rate	5	Mostly bare ground with some herbaceous ground cover	1
Callaghan (2012)	Chile	-28.4	-71.06	11.3	5	0.0344	4.5	Granitic	3	Relief and erosion rate	5	Bare ground	1
Callaghan (2012)	Chile	-28.39	-71.07	14.6	7	0.0334	4.3	Granitic	3	Relief and erosion rate	5	Bare ground	1
Callaghan (2012)	Chile	-28.36	-71.05	17.7	9	0.0309	4	Granitic	3	Relief and erosion rate	5	Bare ground	1
Callaghan (2012)	Chile	-26.57	-70.44	2.1	1	0.0161	2	Granitic	3	Relief and erosion rate	5	Bare ground	1
Callaghan (2012)	Chile	-26.56	-70.48	3.09	1	0.0186	2.3	Granitic	3	Relief and erosion rate	5	Bare ground	1
Callaghan (2012)	Chile	-26.56	-70.51	3.84	2	0.0188	2.3	Granitic	3	Relief and erosion rate	5	Bare ground	1
Callaghan (2012)	Chile	-26.59	-70.49	4.49	2	0.0187	2.3	Granitic	3	Relief and erosion rate	5	Bare ground	1
Callaghan (2012)	Chile	-26.57	-70.56	8.71	4	0.0198	2.4	Granitic	3	Relief and erosion rate	5	Bare ground	1
Callaghan (2012)	Chile	-40.58	-73.69	57.5	17	2.229	183.9	Granitic	3	Relief and erosion rate	5	Forested	5
Callaghan (2012)	Chile	-40.58	-73.6	60.9	20	2.1293	177.9	Granitic	3	Relief and erosion rate	5	Forested	5
Callaghan (2012)	Chile	-37.9	-73.28	40.1	14	1.521	169.3	Granitic	3	Relief and erosion rate	5	Forested	5
Callaghan (2012)	Chile	-36.97	-73.12	93.2	45	1.1298	123.2	Granitic	3	Relief and erosion rate	5	Forested	5
Callaghan (2012)	Chile	-36.97	-73.12	142	65	1.1298	123.2	Granitic	3	Relief and erosion rate	5	Forested	5
Callaghan (2012)	Chile	-35.84	-72.51	66.1	23	0.7983	90.7	Granitic	3	Relief and erosion rate	5	Forested	4
Callaghan (2012)	Chile	-35.86	-72.48	116	42	0.7641	85.3	Granitic	3	Relief and erosion rate	5	Forested	4
Callaghan (2012)	Chile	-34.61	-71.58	18.6	12	0.5963	75.5	Granitic	3	Relief and erosion rate	5	Mostly herbaceous with few trees	2
Callaghan (2012)	Chile	-33.88	-71.5	65.3	29	0.3263	42.3	Granitic	3	Relief and erosion rate	5	Herbaceous	2
Callaghan (2012)	Chile	-33.9	-71.49	32	14	0.3416	45.2	Granitic	3	Relief and erosion rate	5	Herbaceous	2
Callaghan (2012)	Chile	-32.94	-71.42	53.3	23	0.3377	39.6	Granitic	3	Relief and erosion rate	5	Mostly herbaceous with some trees	3
Callaghan (2012)	Chile	-32.27	-71.41	75	31	0.2355	30.1	Granitic	3	Relief and erosion rate	5	Mostly herbaceous with some trees	3
Callaghan (2012)	Chile	-32.27	-71.4	72.7	38	0.2325	30	Granitic	3	Relief and erosion rate	5	Mostly herbaceous with some trees	3
Callaghan (2012)	Chile	-32.08	-71.42	57.9	28	0.1995	25.9	Granitic	3	Relief and erosion rate	5	Mostly herbaceous with some trees	3
Callaghan (2012)	Chile	-31.56	-71.42	61.4	16	0.1504	18.8	Granitic	3	Relief and erosion rate	5	Mostly herbaceous	2
Callaghan (2012)	Chile	-31.52	-71.42	15.9	4	0.171	20.8	Granitic	3	Relief and erosion rate	5	Mostly herbaceous with some trees	3
Callaghan (2012)	Chile	-30.52	-71.66	71.2	29	0.1156	12.6	Granitic	3	Relief and erosion rate	5	Mostly herbaceous with some trees	3
Callaghan (2012)	Chile	-30.53	-71.66	73.7	30	0.1181	13	Granitic	3	Relief and erosion rate	5	Mostly herbaceous with few trees	2
Callaghan (2012)	Chile	-30.55	-71.62	83.8	37	0.1307	14	Granitic	3	Relief and erosion rate	5	Mostly herbaceous with some trees	3
Callaghan (2012)	Chile	-30.57	-71.63	200	88	0.1301	14	Granitic	3	Relief and erosion rate	5	Mostly herbaceous with few trees	2
Callaghan (2012)	Chile	-29.65	-71.11	22.8	8	0.0682	7.5	Granitic	3	Relief and erosion rate	5	Mostly bare ground	1
Callaghan (2012)	Chile	-29.67	-71.16	19.3	7	0.0689	7.7	Granitic	3	Relief and erosion rate	5	Mixture of herbaceous groundcover and bare ground	2
Carretier et al. (2002)	Gurvan Bugd fault system, Mongolia	44.8396	100.303	33	17	0.18	13.9	Gravel	1	Scarp modeling	1	Unvegetated	1
Colman and Watson (1983)	Lane Bonneville, UT, USA	39.6254	-113.211	9	--	0.1597	19.9	Gravel	1	Scarp modeling	1	Grasses and shrubs	2
Enzel et al. (1996)	Southern Arava Valley, Israel	29.6116	34.983	2.5	--	0.018	3.1	Sandy gravel	1	Scarp modeling	1	Unvegetated	1
Hanks (2000)	Lost River, ID, USA	44.1658	-113.87	9.5	--	0.307	28.3	Alluvial gravel	1	Scarp modeling	1	Sagebrush and grasses	2
Hanks and Wallace (1985)	Lake Lahonta, NV, USA	40.1522	-117.925	11	--	0.1398	18.8	Alluvial deposits	1	Scarp modeling	1	Some vegetation	2
Hanks et al. (1984)	Lake Bonneville, UT, USA	39.6131	-112.299	11	--	0.2378	29.5	Gravels	1	Scarp modeling	1	Grasses and shrubs	2
Hanks et al. (1984)	Santa Cruz sea cliffs, CA, USA	36.9837	-122.127	110	--	0.7201	79.8	Mudstone	2	Scarp modeling	1	The lower terraces are farmed while the upper terraces are covered with grasslands. The lower terraces have never been forested (Rosenbloom & Anderson, 1994).	2
Hanks et al. (1984)	Raymond Fault Scarp, LA, CA, USA	34.1193	-118.131	160	--	0.329	46.2	Coarse alluvial deposits	1	Scarp modeling	1	Grasses and some trees	3
Hanks et al. (1984)	Drum Mtnts., UT, USA	39.6497	-112.136	11	--	0.2635	32.6	Alluvial gravels	1	Scarp modeling	1	Low shrubs such as sagebrush and shadscale	2
Heimsath et al. (2000)	Nunnock River, SE Australia	-36.6051	149.493	40	--	0.7395	86.9	Granodiorite	3	Laplacian of whole slope and erosion rate	2	Schlerophyll forest	3
Heimsath et al. (2005)	Nunnock River, SE Australia	-36.6051	149.493	28	--	0.7395	86.9	Granodiorite	3	Sediment flux from depth-integrated soil production rates and depth*gradient product	4	Schlerophyll forest	3
Hughes et al. (2009)	Charwell Basin, New Zealand	-42.4496	173.357	88	--	1.4203	115.9	Loess underlain by fluvial gravel terraces	1	Sediment flux from deposits and slope	4	Podocarp and beech forest	3
Hurst et al. (2012)	Feather River, CA, USA	39.6519	-121.312	86	--	1.009	117.3	Granitoids	3	Best-fit D for 21 sites w/ridgetop Laplacians and cosmogenic-derived erosion rates	2	Mixed conifer forest	4
Hurst et al. (2013)	Feather River, CA, USA	39.7237	-121.285	48	18	1.1035	112.5	Metavolcanics	3	Ridgetop Laplacian and erosion rates	2	Mixed conifer forest	4
Hurst et al. (2013)	Feather River, CA, USA	39.7099	-121.262	88	33	1.1526	150.2	Granodiorite	3	Ridgetop Laplacian and erosion rates	2	Mixed conifer forest	4
Mattson and Bruhn (2001)	Lake Bonneville, UT, USA	40.4892	-112.326	12	3	0.4097	43.7	Alluvial shoreline deposits	1	Scarp modeling	1	Scrubland with some trees	2
Mattson and Bruhn (2001)	Wasatch Fault Zone, UT, USA	40.7236	-111.823	28	11	0.4203	49.1	Alluvial gravels	1	Scarp modeling	1	Scrubland with some trees	2
McGuire (2014).	San Francisco Volcanic Field in northern Arizona (SFVF)	35.39	-111.57	40	--	0.4392	49.3	Basaltic cinder cones	1	Assumed initial shape and age in conjunction with a numerical model	3	Pinyon pine, sagebrush at lower elevation to Ponderosa pine forests at higher elevation	3
McGuire (2014).	Springerville Volcanic Field in east-central Arizona (SVF)	34.19	-109.57	50	--	0.4986	56.4	Basaltic cinder cones	1	Assumed initial shape and age in conjunction with a numerical model	3	Ponderosa pine, Gambel oak, alligator bark juniper, Douglas fir, pinyon pine, sagebrush and juniper in lower elevations	3
McGuire (2014).	Medicine Lake Volcanic Field in northeastern California (MLVF)	41.64	-121.74	75	--	0.4412	45.2	Basaltic and basaltic/andesitic cones	1	Assumed initial shape and age in conjunction with a numerical model	3	Lodgepole pine, ponderosa, Jeffrey pine, sugar pine, western white pine. Red and white fir at higher elevations. Western juniper at lower elevations	3
McKean et al. (1993)	East Bay Regional Park, CA, USA	37.9737	-121.865	360	55	0.341	43.1	Marine shale	2	Qs and slope	4	Grasslands	2
Nash (1980a)	Emmet County, MI, USA	45.5748	-85.1132	120	--	0.9419	77.9	Cohesionless sand and gravel moraine deposits	1	Scarp modeling	1	Native hardwoods with scattered white pine and hemlocks, pine, oak, and beech	4
Nash (1980b)	Drum Mtns., UT, USA	39.6497	-112.136	4	--	0.2635	32.6	Alluvial gravels	1	Scarp modeling	1	Low shrubs such as sagebrush and shadscale	2
Nash (1984)	Hebgen Lake, MT, USA	44.701	-111.204	20	2.4	0.7165	62.2	Sand and gravel	1	Scarp modeling	1	Prairie grasses and some pine trees	3
Niviere and Marquis (2000)	Upper Rhine Graben, Germany	47.637	7.516	14	--	0.8817	73	Fluvial gravels and coarse sands	1	Estimate from both scarp modeling and from estimating sediment volume at the toe of a man-made scarp.	1	Forested	4
Pelletier and Cline (2007)	Lathrop Wells, NV, USA	36.69	-116.51	39	--	0.0697	10.9	Loose vesicular scoria lapilli	1	Numerical modeling using initial and current shape. Age of cone is 77 ka from radiometric dating	3	Mostly unvegetated	1
Pelletier et al. (2006)	Lake Bonneville, UT, USA	39.4	-113.7	10	--	0.2034	25	Alluvial shoreline scarps (mostly sand and/or gravels)	1	Compared midpoint-slope-inverse method, slope-offset method, and full-scarp method	1	Grasses and shrubs	2
Pelletier et al. (2011)	Banco Bonito lava flow, Valles Caldera, NM, USA	36.84	-106.59	4	--	0.4436	48.2	Rhyolite	3	Measured soil thickness and known age of lava flow to test a nonlinear, numerical LEM and choose the best parameter	3	Ponderosa pine, gamble oak scrublands, and mixed conifer forest	3
Perron et al. (2012)	Allegheny Plateau, PA, USA	39.9709	-80.2607	100	--	0.9766	105	Sandstone	2	Ridgetop Laplacian and erosion rate	2	Deciduous forest	4
Perron et al. (2012)	Gabilan Mesa, CA, USA	35.9225	-120.826	124	19	0.1787	28.4	Poorly consolidated conglomerate	2	Ridgetop Laplacian and erosion rate	2	Grasses and oaks	3
Pierce and Colman (1986)	Big Lost River Valley, ID, USA	43.8093	-113.336	20.75	--	0.2842	28.3	Carbonate gravels and sands	1	Scarp modeling of analytical solution with error function	1	South-facing slopes are shrub desert and the north-facing slopes are prairie grassland	2
Reneau (1988) reported in Heimsath et al. (2005)	Tennessee Valley, CA, USA	37.8632	-122.55	50	--	0.9429	94.2	Intensely sheared thrust sheets of greenstone, greywacke sandstone and chert (Franciscan assemblage)	2	Colluvial infilling of landslide deposits	4	Coastal grassland and scrub	2
Reneau (1988) reported in Heimsath et al. (2005)	Point Reyes, CA, USA	38.0468	-122.852	30	--	0.9348	99.1	Quartz diorite and granodiorite	3	Colluvial infilling of landslide deposits	4	Bishop pine forest	4
Reneau et al. (1989)	Clearwater River, WA, USA	47.66	-124	47	--	4.2032	310.5	Silts, sandstones and conglomerates	2	Qs estimates from dating hollow deposits (~10,000 yr timescale) and slope.	4	Western hemlock and Pacific silver fir forest	5
Riggins et al. (2011)	Bodmin Moor, Cornwall, UK	50.508	-4.43912	394.27	163	1.9607	113.5	Granite	3	Ridgetop Laplacian and soil production rate	2	Grasses, (previously hazel, and oak woodland)	4
Roering et al. (1999)	Sullivan Creek, OR, USA	43.463	-124.119	36	16	1.9953	167.6	Turbidite beds (Tyee Formation)	2	Minimized error between modeled erosion rates and measured erosion rates for non-linear erosion equation.	3	Douglas fir and mixed conifer forest	4
Roering et al. (2002)	Charwell River, South Island, New Zealand	-42.4496	173.357	120	80	1.4203	115.9	5m thick loess cap on top of fluvial gravel terraces	1	Curvature and timescale of vegetation-driven creep (9K yr) on slope	2	Podocarp and beech forest	3
Roering et al. (2004)	Charwell River, South Island, New Zealand	-42.4496	173.357	160	50	1.4203	115.9	Loess underlain by fluvial gravel terraces	1	Numerical modeling in a similar style to scarp diffusion (but assumes initial loess surface geometry instead)	3	Podocarp and beech forest	3
Rosenbloom and Anderson (1994)	Santa Cruz, CA, USA	36.9837	-122.127	100	--	0.7201	79.8	Mudstone	2	Numerical model with best-fit D	3	The lower terraces are farmed while the upper terraces are covered with grasslands. The lower terraces have never been forested.	2
Small et al. (1999)	Wind River Range, WY, USA	43.37	-109.75	175.5	12	1.0016	60.3	Granite and gneiss	3	Ridgetop Laplacian and erosion rates	2	Mostly unvegetated	6
Spelz et al. (2008)	Laguna Salada, Baja California, Mexico	32.0748	-115.383	0.41	0.3	0.0447	8.3	Gravel terraces	1	Finite-slope and infinite-slope scarp modeling technique	1	Mostly unvegetated, but some vegetation near active fans and channel bars.	1
Tapponiier et al. (1990)	Qilian Shan, China	39.2618	99.6076	33	17	0.1121	11.9	Fanglomerates	1	Scarp modeling	1	Mostly unvegetated	1
This study	Great Smokey Mountains, NC, USA	35.6217	-83.2041	18.7	1	1.3808	153.5	Quartzite	3	Ridgetop Laplacian and erosion rates	2	Deciduous forest	4
This study	San Bernardino Mountains, CA, USA	34.0514	-116.934	175.5	21	0.5927	72.9	Primarily granitic rocks (quartz monzonite and gneiss)	3	Ridgetop Laplacian and erosion rates	2	Chaparral and oak	3
This study	Wasatch Mountains, UT, USA	40.8922	-111.865	83.2	15	0.4463	51.5	Gneiss	3	Ridgetop Laplacian and erosion rates	2	Patchy vegetation with trees, sage, and grasses	3
This study	San Gabriel Mountains, CA, USA	34.3641	-117.992	71.3	12	0.658	77.1	Primarily granitic and metamorphic rocks.	3	Ridgetop Laplacian and erosion rates	2	Chaparral, deciduous and conifers	3
This study	Tennessee Valley, CA, USA	37.85	-122.55	174.3	21	0.888	84.4	Intensely sheared thrust sheets of greenstone, greywacke sandstone and chert (Franciscan assemblage)	2	Ridgetop Laplacian and erosion rates	2	Coastal grassland and scrub	2
This study	Oregon Coast Range, OR, USA	44.5165	-123.844	167	37	2.5519	222.7	Tyee Sandstone	3	Ridgetop Laplacian and erosion rates	2	Dense coniferous forest	4
This study	Blasingame, CA, USA	36.9535	-119.631	22.5	3	0.2559	38.7	Tonalite	3	Ridgetop Laplacian and erosion rate	2	Oak grassland	3
This study	Atacama Desert, Chile	-24.13	-69.99	1.4	0.5	0.005	0.7	Granitic	3	Ridgetop Laplacian and erosion rates	2	Desert	1
This study	Atacama Desert, Chile	-29.77	-71.08	15.5	2	0.0702	7.8	Granitic	3	Ridgetop Laplacian and erosion rates	2	Desert	1
Walther et al. (2009)	Blue Mountains, WA, USA	46.148	-117.938	48	7	0.8228	74.4	Basalt bedrock, but blanketed with loess, which controls erosion rate.	2	Slope of line between differential erosion rate (from glass age estimate and peak profile of Mazama ash) and differential curvature.	2	Coniferous forest	4
West et al. (2014)f	Susquehanna Shale Hills Critical Observatory, PA, USA	40.6668	-77.9028	61.13	33	0.9494	97.6	Shale	2	Meteoric 10Be and slope	4	Deciduous forest on hillslopes and hemlock and pine in valley	4
aIf the exact location was not able to be identified, we used the location that best matched the site description. If multiple measurements were made for a region, we report the mean lat/lon for the study.
bUncertainties are reported as they were presented in the original journals. If uncertainties were not reported, we calculated and reported the standard deviation of D when possible.
cRock category: 1 = unconsolidated, 2 = sedimentary, 3 = Igneous/metamorphic.
dTechnique category: 1 = Scarp modeling, 2 = Laplacian and erosion rates, 3 = LEM, 4 = Colluvial flux and slope, 5 = erosion rate and Laplacian.
eVegetation category: 1 = Arid/desert, 2 = grasslands/scrublands, 3 = savannah/lightly forested, 4=forested.
fWest et al. (2014) reported the range of D for noth-facing and south-facing slopes. We reported the mean of these values.
